# Supplementary material for: Confounding Factors Influencing the Kinetic and the Magnitude of Serological Response Following Administration of BNT162b2
Source: Preprints.org preprint supplement (doi:10.20944/preprints202106.0237.v1), 2021-06-08
Supplement: Supplementary file 1 [file supplementary]

**Table S1: Multivariable linear regression for Anti-S/RBD IgG antibody titers.** Statistically significant variables are marked in bold for each (sub) analyses performed. The regression coefficient (i.e the β estimate) obtained shows the increase or decrease in log10-transformed anti-Spike/RBD values outcome per unit increase in the factor studied, adjusted for the effect of other variables in the model. Results reported the β estimate, its 95% confidence interval, and the corresponding p-value for the variable of interest in a particular model. The adjusted R-square is also reported for each model run. R-square for multicollinearity was always below 0.20 for all model tested.

|  | **Day 14** | | **Day 28** | | **Day 42** | |
| --- | --- | --- | --- | --- | --- | --- |
| **Variable** | **Beta (95%CI)** | **p-value** | **Beta (95%CI)** | **p-value** | **Beta (95%CI)** | **p-value** |
| **Full cohort** | **N analyzed = 192, Adjusted R2: 0.778** | | **N analyzed = 196, Adjusted R2: 0.115** | | **N analyzed = 184, Adjusted R2: 0.103** | |
| Sex (male) | -0.09812 (-0.2448 to 0.04860) | 0.1887 | 0.07499 (-0.2018 to 0.09401) | 0.4730 | -0.0981 (-0.202 to 0.00636) | 0.0655 |
| **Age (years)** | **-0.01259 (-0.01800 to -0.007172)** | **<0.0001** | **-0.002714 (-0.01145 to -0.0007421)** | **0.0259** | -0.00336 (-0.00712 to 0.000400) | 0.0795 |
| BMI (kg/m2) | 0.009489 (-0.005105 to 0.02408) | 0.2012 | 0.007403 (-0.007995 to 0.02121) | 0.3732 | 0.00354 (-0.00676 to 0.0138) | 0.4985 |
| Blood group A | 0.02738 (-0.1103 to 0.1651) | 0.6953 | 0.06961 (-0.1417 to 0.1329) | 0.9494 | -0.0209 (-0.116 to 0.0739) | 0.6640 |
| **Blood group AB** | **-0.3152 (-0.6225 to -0.007893)** | **0.0445** | 0.1577 (-0.3702 to 0.2520) | 0.7083 | -0.138 (-0.374 to 0.0975) | 0.2489 |
| Blood group B | 0.1721 (-0.05609 to 0.4002) | 0.1385 | 0.1167 (-0.2422 to 0.2182) | 0.9184 | 0.0249 (-0.149 to 0.199) | 0.7779 |
| **Previous SARS-CoV-2** | **1.683 (1.545 to 1.821)** | **<0.0001** | **0.06957 (0.1473 to 0.4218)** | **<0.0001** | **0.209 (0.111 to 0.307)** | **<0.0001** |
| **SARS-CoV-2 Naïve** | **N analyzed = 133, Adjusted R2: 0.160** | | **N analyzed = 134, Adjusted R2: 0.044** | | **N analyzed = 131, Adjusted R2: 0.070** | |
| **Sex (male)** | -0.153 (-0.3281 to 0.02204) | 0.0861 | -0.07752 (-0.2753 to 0.1202) | 0.4393 | **-0.1286 (-0.2509 to -0.006370)** | **0.0394** |
| **Age (years)** | **-0.01474 (-0.02135 to -0.008119)** | **<0.0001** | **-0.007837 (-0.01524 to -0.0004362)** | **0.0381** | -0.00413 (-0.008652 to 0.0003919) | 0.0731 |
| BMI (kg/m2) | 0.007087 (-0.01012 to 0.02429) | 0.4165 | 0.005132 (-0.01392 to 0.02418) | 0.5949 | 0.000847 (-0.01085 to 0.01254) | 0.8863 |
| Blood group (A) | 0.002837 (-0.1647 to 0.1703) | 0.9733 | -0.02639 (-0.2117 to 0.1589) | 0.7785 | -0.03809 (-0.1517 to 0.07554) | 0.5083 |
| Blood group (AB) | -0.1533 (-0.5041 to 0.1975) | 0.3888 | -0.01729 (-0.4108 to 0.3762) | 0.9308 | -0.1421 (-0.3979 to 0.1136) | 0.2734 |
| Blood group (B) | 0.1333 (-0.1451 to 0.4117) | 0.3453 | -0.1138 (-0.4253 to 0.1976) | 0.4709 | 0.0408 (-0.1654 to 0.2470) | 0.6960 |
| **Previous SARS-CoV-2** | **N analyzed = 59, Adjusted R2: 0.294** | | **N analyzed = 62, Adjusted R2: 0.114** | | **N analyzed = 53, Adjusted R2: 0.056** | |
| Sex (male) | 0.06036 (-0.2002 to 0.3209) | 0.6440 | -0.003949 (-0.2018 to 0.1939) | 0.9682 | -0.009967 (-0.2211 to 0.2012) | 0.09502 |
| Age (years) | -0.002444 (-0.01219 to 0.007299) | 0.6168 | -0.0008248 (-0.007887 to 0.006237) | 0.8158 | -0.0008263 (-0.008100 to 0.006448) | 0.2286 |
| BMI (kg/m2) | 0.01918 (-0.007521 to 0.04589) | 0.1554 | 0.01466 (-0.006176 to 0.03549) | 0.1642 | 0.01646 (-0.007005 to 0.03992) | 1.412 |
| Blood group (A) | 0.1692 (-0.07606 to 0.4145) | 0.1721 | 0.09159 (-0.09532 to 0.2785) | 0.3304 | 0.06968 (-0.1200 to 0.2594) | 0.7393 |
| Blood group (AB) | 0.2079 (-0.1760 to 0.5917) | 0.2822 | 0.1837 (-0.1153 to 0.4827) | 0.2235 | -0.0323 (-0.3751 to 0.3105) | 0.1897 |
| **Blood group (B)** | **-1.086 (-1.713 to -0.4597)** | **0.0010** | -0.3325 (-0.8222 to 0.1572) | 0.1792 | -0.1932 (-0.8326 to 0.4462) | 0.6083 |
| **Female gender** | **N analyzed = 143, Adjusted R2: 0.759** | | **N analyzed = 147, Adjusted R2: 0.130** | | **N analyzed = 140, Adjusted R2: 0.107** | |
| **Age (years)** | **-0.01167 (-0.02280 to -0.0005468)** | **0.0399** | -0.001849 (-0.01232 to 0.008620) | 0.7275 | -0.003665 (-0.01108 to 0.003752) | 0.3302 |
| BMI (kg/m2) | 0.01109 (-0.005272 to 0.02745) | 0.1824 | 0.01051 (-0.005007 to 0.02603) | 0.1827 | 0.005487 (-0.005657 to 0.01663) | 0.3318 |
| Blood group A | 0.0541 (-0.1096 to 0.2178) | 0.5146 | -0.01694 (-0.1718 to 0.1379) | 0.8291 | -0.03186 (-0.1408 to 0.07710) | 0.5639 |
| **Blood group AB** | **-0.4756 (-0.8663 to -0.08498)** | **0.0174** | -0.06347 (-0.4398 to 0.3129) | 0.7393 | -0.2011 (-0.4609 to 0.05870) | 0.1281 |
| Blood group B | 0.1385 (-0.1621 to 0.4390) | 0.3638 | 0.1689 (-0.1196 to 0.4575) | 0.2491 | -0.002485 (-0.2374 to 0.2325) | 0.9833 |
| Menopaused | -0.08219 (-0.3504 to 0.1860) | 0.5455 | -0.1477 (-0.4021 to 0.1067) | 0.2528 | 0.04522 (-0.1385 to 0.2290) | 0.6272 |
| **Previous SARS-CoV-2** | **1.625 (1.457 to 1.792)** | **<0.0001** | **0.2627 (0.1052 to 0.4203)** | **0.0012** | **0.1854 (0.07177 to 0.2990)** | **0.0016** |
| **Childbearing age** | **N analyzed = 98, Adjusted R2: 0.831** | | **N analyzed = 100, Adjusted R2: 0.169** | | **N analyzed = 96, Adjusted R2: 0.194** | |
| **Age (years)** | **-0.01433 (-0.02458 to -0.004071)** | **0.0067** | -0.001916 (-0.01127 to 0.007436) | 0.6850 | -0.00417 (-0.01114 to 0.002796) | 0.2374 |
| **BMI (kg/m2)** | **0.02571 (0.006468 to 0.04495)** | **0.0094** | 0.01571 (-0.001809 to 0.03323) | 0.0782 | 0.01136 (-0.001957 to 0.02468) | 0.0936 |
| Blood group A | -0.003061 (-0.1658 to 0.1597) | 0.9703 | 0.01863 (-0.1309 to 0.1682) | 0.8051 | 0.0009382 (-0.1094 to 0.1112) | 0.9866 |
| **Blood group AB** | **-0.5378 (-0.8907 to -0.1849)** | **0.0032** | -0.01882 (-0.3476 to 0.3100) | 0.9097 | -0.1414 (-0.3783 to 0.09552) | 0.2388 |
| Blood group B | 0.02588 (-0.2813 to 0.3331) | 0.8674 | 0.1086 (-0.1742 to 0.3914) | 0.4477 | -0.1106 (-0.3314 to 0.1102) | 0.3222 |
| Use of contraceptive | -0.03245 (-0.1964 to 0.1315) | 0.6951 | 0.07693 (-0.07597 to 0.2298) | 0.3203 | 0.07073 (-0.04599 to 0.1874) | 0.2317 |
| **Previous SARS-CoV-2** | **1.604 (1.445 to 1.763)** | **<0.0001** | **0.2596 (0.1122 to 0.4070)** | **0.0007** | **0.1964 (0.08644 to 0.3063)** | **0.0006** |
| **Menopausal** | **N analyzed = 40, Adjusted R2: 0.059** | | **N analyzed = 42, Adjusted R2: 0.089** | | **N analyzed = 39, Adjusted R2: 0.148** | |
| Age (years) | -0.0004572 (-0.04205 to 0.04113) | 0.9823 | -0.01397 (-0.05149 to 0.02355) | 0.4546 | -0.00341 (-0.02931 to 0.02249) | 0.7901 |
| BMI (kg/m2) | -0.008783 (-0.04905 to 0.03148) | 0.6598 | 0.006668 (-0.03101 to 0.04435) | 0.7213 | 0.003677 (-0.02220 to 0.02955) | 0.7739 |
| Blood group A | 0.2474 (-0.2391 to 0.7338) | 0.3080 | -0.09809 (-0.5421 to 0.3459) | 0.6563 | -0.11 (-0.4161 to 0.1961) | 0.4692 |
| Blood group B | 0.04948 (-0.8481 to 0.9470) | 0.9113 | 0.0671 (-0.7753 to 0.9095) | 0.8724 | 0.5643 (-0.3416 to 1.470) | 0.2134 |
| Blood group AB | -0.5564 (-2.042 to 0.9292) | 0.4511 | -0.472 (-1.865 to 0.9214) | 0.4959 | -0.6349 (-1.596 to 0.3258) | 0.1875 |
| Use of HRT | 0.2958 (-0.2526 to 0.8441) | 0.2801 | 0.2435 (-0.2575 to 0.7445) | 0.3302 | 0.1494 (-0.2129 to 0.5116) | 0.4068 |
| **Previous SARS-CoV-2** | **1.54 (1.001 to 2.078)** | **<0.0001** | 0.1739 (-0.3010 to 0.6487) | 0.4619 | 0.1337 (-0.2194 to 0.4867) | 0.4458 |

**Abbreviations:** BMI, body mass index; CI, confidence interval; HRT, hormone replacement therapy; R2, R-square
